# Supplementary material for: Quantification of T- and B-cell Immune Receptor Distribution Diversity Characterizes Immune Cell Infiltration and Lymphocyte Heterogeneity in Clear Cell Renal Cell Carcinoma
Source: Oxford University Press journal article supplement (doi:10.1158/0008-5472.can-21-1747), 2022-01-14
Supplement: can-21-1747_supplementary_data_suppsd3.xlsx [file can-21-1747_supplementary_data_suppsd3.xlsx]

## Sheet: Summary
	TRA							TRB							TRA+TRB
		richness			evenness	optimal			richness			evenness	optimal			richness			evenness	optimal				Key
		low q	IP slope	delta qD	high q	IP q			low q	IP slope	delta qD	high q	IP q			low q	IP slope	delta qD	high q	IP q				p-val < 0.05
	score split by median							score split by median							score split by median									p-val < 0.15
	overall survival (OS)							overall survival (OS)							overall survival (OS)
	gender (male vs female)							gender (male vs female)							gender (male vs female)
	race (white vs non-white)							race (white vs non-white)							race (white vs non-white)
	grade							grade							grade
	pT							pT							pT
	pN							pN							pN
	pM							pM							pM
	BAP1 mutation							BAP1 mutation							BAP1 mutation
	KDM5C mutation							KDM5C mutation							KDM5C mutation
	MTOR mutation							MTOR mutation							MTOR mutation
	PBRM1 mutation							PBRM1 mutation							PBRM1 mutation
	PTEN mutation							PTEN mutation							PTEN mutation
	SETD2 mutation							SETD2 mutation							SETD2 mutation
	TP53 mutation							TP53 mutation							TP53 mutation
	VHL mutation							VHL mutation							VHL mutation
	number of mutations							number of mutations							number of mutations

## Sheet: TRA
low q diversity					inflection point slope diversity					ΔD diversity					high q diversity					inflection point q
Clinical Variable	p-value	test	result		Clinical Variable	p-value	test	result		Clinical Variable	p-value	test	result		Clinical Variable	p-value	test	result		Clinical Variable	p-value	test	result
score split by median	<0.0001	t-test	mean below: 13.53; mean above: 43.93		score split by median	<0.0001	t-test	mean below: 3.411; mean above: 17.21		score split by median	<0.0001	t-test	mean below: 7.619; mean above: 33.95		score split by median	<0.0001	t-test	mean below: 4.157; mean above: 11.66		score split by median	<0.0001	t-test	mean below: 1.754; mean above: 4.353
overall survival (OS)	0.2523	log-rank test	median survival below: 2386 days; above: 3615 days		overall survival (OS)	0.2024	log-rank test	median survival below: 2564 days; above: 3615 days		overall survival (OS)	0.2396	log-rank test	median survival below: 2564 days; above: 3615 days		overall survival (OS)	0.4522	log-rank test	median survival below: 2564 days; above: undef		overall survival (OS)	0.6104	log-rank test	median survival below: 2764 days; above: undef
gender (male vs female)	0.5946	t-test	mean male: 29.17; mean female: 27.88		gender (male vs female)	0.7925	t-test	mean male: 10.42; mean female: 10.10		gender (male vs female)	0.8404	t-test	mean male: 20.94; mean female: 20.49		gender (male vs female)	0.1175	t-test	mean male: 8.232; mean female: 7.394		gender (male vs female)	0.2038	t-test	mean male: 3.139; mean female: 2.929
race (white vs non-white)	0.1972	t-test	mean white: 29.25; mean non-white: 23.46		race (white vs non-white)	0.2101	t-test	mean white: 10.57; mean non-white: 7.766		race (white vs non-white)	0.1783	t-test	mean white: 21.29; mean non-white: 15.69		race (white vs non-white)	0.8521	t-test	mean white: 7.953; mean non-white: 7.769		race (white vs non-white)	0.9713	t-test	mean white: 3.069; mean non-white: 3.058
grade	0.0016	ANOVA			grade	0.0003	ANOVA			grade	0.0008	ANOVA			grade	0.0004	ANOVA			grade	0.0428	ANOVA
pT	0.005	ANOVA			pT	0.0359	ANOVA			pT	0.0228	ANOVA			pT	0.0257	ANOVA			pT	0.3043	ANOVA
pN	0.1363	ANOVA			pN	0.285	ANOVA			pN	0.1392	ANOVA			pN	0.5063	ANOVA			pN	0.4682	ANOVA
pM	0.0011	ANOVA			pM	0.0013	ANOVA			pM	0.0022	ANOVA			pM	0.0127	ANOVA			pM	0.1642	ANOVA
BAP1 mutation	0.1328	t-test	mean wildtype: 28.55; mean mutant: 34.15		BAP1 mutation	0.1265	t-test	mean wildtype: 10.21; mean mutant: 13.05		BAP1 mutation	0.1338	t-test	mean wildtype: 20.64; mean mutant: 25.82		BAP1 mutation	0.6048	t-test	mean wildtype: 7.909; mean mutant: 8.329		BAP1 mutation	0.2442	t-test	mean wildtype: 3.054; mean mutant: 2.771
KDM5C mutation	0.0828	t-test	mean wildtype: 29.80; mean mutant: 21.62		KDM5C mutation	0.1219	t-test	mean wildtype: 10.81; mean mutant: 7.170		KDM5C mutation	0.0821	t-test	mean wildtype: 21.80; mean mutant: 14.20		KDM5C mutation	0.5749	t-test	mean wildtype: 8.000; mean mutant: 7.423		KDM5C mutation	0.071	t-test	mean wildtype: 2.981; mean mutant: 3.536
MTOR mutation	0.5921	t-test	mean wildtype: 29.39; mean mutant: 26.77		MTOR mutation	0.8563	t-test	mean wildtype: 10.58; mean mutant: 10.14		MTOR mutation	0.7211	t-test	mean wildtype: 21.37; mean mutant: 19.75		MTOR mutation	0.3467	t-test	mean wildtype: 8.024; mean mutant: 7.021		MTOR mutation	0.8732	t-test	mean wildtype: 3.017; mean mutant: 3.068
PBRM1 mutation	0.019	t-test	mean wildtype: 31.44; mean mutant: 25.61		PBRM1 mutation	0.004	t-test	mean wildtype: 11.90; mean mutant: 8.345		PBRM1 mutation	0.0032	t-test	mean wildtype: 23.84; mean mutant: 17.06		PBRM1 mutation	0.1723	t-test	mean wildtype: 7.596; mean mutant: 8.413		PBRM1 mutation	0.0005	t-test	mean wildtype: 2.806; mean mutant: 3.369
PTEN mutation	0.8253	t-test	mean wildtype: 29.16; mean mutant: 30.40		PTEN mutation	0.8242	t-test	mean wildtype: 10.52; mean mutant: 11.14		PTEN mutation	0.8693	t-test	mean wildtype: 21.22; mean mutant: 22.08		PTEN mutation	0.7542	t-test	mean wildtype: 7.940; mean mutant: 8.323		PTEN mutation	0.1692	t-test	mean wildtype: 2.996; mean mutant: 3.498
SETD2 mutation	0.5938	t-test	mean wildtype: 28.96; mean mutant; 30.81		SETD2 mutation	0.6722	t-test	mean wildtype: 10.65; mean mutant; 9.921		SETD2 mutation	0.6458	t-test	mean wildtype: 21.24; mean mutant; 19.67		SETD2 mutation	<0.0001	t-test	mean wildtype: 7.488; mean mutant; 10.82		SETD2 mutation	0.0002	t-test	mean wildtype: 2.904; mean mutant; 3.727
TP53 mutation	0.5879	t-test	mean wildtype: 29.34; mean mutant: 25.48		TP53 mutation	0.7189	t-test	mean wildtype: 10.59; mean mutant: 9.313		TP53 mutation	0.7157	t-test	mean wildtype: 21.33; mean mutant: 18.93		TP53 mutation	0.348	t-test	mean wildtype: 8.002; mean mutant: 6.551		TP53 mutation	0.6394	t-test	mean wildtype: 3.027; mean mutant: 2.810
VHL mutation	0.288	t-test	mean wildtype: 30.72; mean mutant: 28.12		VHL mutation	0.2522	t-test	mean wildtype: 11.35; mean mutant: 9.958		VHL mutation	0.3621	t-test	mean wildtype: 22.45; mean mutant: 20.39		VHL mutation	0.3183	t-test	mean wildtype: 8.265; mean mutant: 7.734		VHL mutation	0.4593	t-test	mean wildtype: 3.088; mean mutant: 2.970
number of total mutations	0.2846	Spearman	Spearman r: -0.05593, CI: (-0.1602, 0.04960)		number of total mutations	0.1748	Spearman	Spearman r: -0.07088, CI: (-0.1748, 0.03461)		number of total mutations	0.1977	Spearman	Spearman r: -0.06731, CI: (-0.1713, 0.03820)		number of total mutations	0.5454	Spearman	Spearman r: 0.03162, CI: (-0.07386, 0.1364)		number of total mutations	0.2091	Spearman	Spearman r: 0.06563, CI: (-0.03987, 0.1697)
number of shortlist mutations	0.6204	ANOVA			number of shortlist mutations	0.4527	ANOVA			number of shortlist mutations	0.4237	ANOVA			number of shortlist mutations	0.3605	ANOVA			number of shortlist mutations	0.0113	ANOVA
	0.1628	Spearman	Spearman r: -0.07290, CI: (-0.1768, 0.03258)			0.079	Spearman	Spearman r: -0.09169, CI: (-0.1950, 0.01368)			0.0473	Spearman	Spearman r: -0.1035, CI: (-0.2064, 0.001788)			0.3329	Spearman	Spearman r: 0.05061, CI: (-0.05491, 0.1550)			0.005	Spearman	Spearman r: 0.1459, CI: (0.04133, 0.2474)

## Sheet: TRB
low q diversity					inflection point slope diversity					ΔD diversity					high q diversity					inflection point q
Clinical Variable	p-value	test	result		Clinical Variable	p-value	test	result		Clinical Variable	p-value	test	result		Clinical Variable	p-value	test	result		Clinical Variable	p-value	test	result
score split by median	< 0.0001	t-test	mean below: 12.79; mean above: 44.80		score split by median	< 0.0001	t-test	mean below: 3.052; mean above: 17.57		score split by median	< 0.0001	t-test	mean below: 6.985; mean above: 35.59		score split by median	< 0.0001	t-test	mean below: 4.004; mean above: 11.20		score split by median	< 0.0001	t-test	mean below: 1.603; mean above: 4.076
overall survival (OS)	0.9395	log-rank test	median survival below: 2601 days; above: 3615 days		overall survival (OS)	0.3179	log-rank test	median survival below: 2454 days; above: 3554 days		overall survival (OS)	0.7158	log-rank test	median survival below: 2601 days; above: 3554 days		overall survival (OS)	0.4245	log-rank test	median survival below: 2764 days; above: 2830 days		overall survival (OS)	0.5477	log-rank test	median survival below: 2830 days; above: 2601 days
gender (male vs female)	0.2152	t-test	mean male: 30.07; mean female: 26.98		gender (male vs female)	0.4143	t-test	mean male: 10.68; mean female: 9.677		gender (male vs female)	0.4405	t-test	mean male: 21.95; mean female: 20.16		gender (male vs female)	0.0148	t-test	mean male: 8.121; mean female: 6.815		gender (male vs female)	0.0216	t-test	mean male: 2.965; mean female: 2.616
race (white vs non-white)	0.0727	t-test	mean white: 29.63; mean non-white: 21.88		race (white vs non-white)	0.1748	t-test	mean white: 10.55; mean non-white: 7.655		race (white vs non-white)	0.1096	t-test	mean white: 21.82; mean non-white: 15.41		race (white vs non-white)	0.1521	t-test	mean white: 7.808; mean non-white: 6.474		race (white vs non-white)	0.6515	t-test	mean white: 2.847; mean non-white: 2.966
grade	< 0.0001	ANOVA			grade	< 0.0001	ANOVA			grade	< 0.0001	ANOVA			grade	0.0586	ANOVA			grade	0.0522	ANOVA
pT	0.0008	ANOVA			pT	0.0017	ANOVA			pT	0.0019	ANOVA			pT	0.0753	ANOVA			pT	0.8597	ANOVA
pN	0.0489	ANOVA			pN	0.0479	ANOVA			pN	0.0444	ANOVA			pN	0.3997	ANOVA			pN	0.6134	ANOVA
pM	0.0003	ANOVA			pM	0.0009	ANOVA			pM	0.001	ANOVA			pM	0.0154	ANOVA			pM	0.7905	ANOVA
BAP1 mutation	0.0023	t-test	mean wildtype: 27.85; mean mutant: 39.67		BAP1 mutation	0.0004	t-test	mean wildtype: 9.668; mean mutant: 16.44		BAP1 mutation	0.0015	t-test	mean wildtype: 20.25; mean mutant: 31.65		BAP1 mutation	0.6155	t-test	mean wildtype:7.605 ; mean mutant: 8.017		BAP1 mutation	0.0618	t-test	mean wildtype: 2.895; mean mutant: 2.460
KDM5C mutation	0.0732	t-test	mean wildtype: 29.81; mean mutant: 21.11		KDM5C mutation	0.1073	t-test	mean wildtype: 10.71; mean mutant: 6.853		KDM5C mutation	0.0727	t-test	mean wildtype: 22.12; mean mutant: 14.02		KDM5C mutation	0.5534	t-test	mean wildtype: 7.695; mean mutant: 7.087		KDM5C mutation	0.1879	t-test	mean wildtype: 2.819; mean mutant: 3.202
MTOR mutation	0.4906	t-test	mean wildtype: 29.43; mean mutant: 26.02		MTOR mutation	0.5068	t-test	mean wildtype: 10.55; mean mutant: 8.932		MTOR mutation	0.4958	t-test	mean wildtype: 21.76; mean mutant: 18.63		MTOR mutation	0.7873	t-test	mean wildtype: 7.671; mean mutant: 7.390		MTOR mutation	0.8445	t-test	mean wildtype: 2.841; mean mutant: 2.900
PBRM1 mutation	0.0032	t-test	mean wildtype: 32.08; mean mutant: 24.62		PBRM1 mutation	0.0006	t-test	mean wildtype: 12.09; mean mutant: 7.813		PBRM1 mutation	0.0007	t-test	mean wildtype: 24.63; mean mutant: 16.65		PBRM1 mutation	0.3312	t-test	mean wildtype: 7.452; mean mutant: 7.972		PBRM1 mutation	0.0001	t-test	mean wildtype: 2.623; mean mutant: 3.199
PTEN mutation	0.6617	t-test	mean wildtype: 29.09; mean mutant: 31.71		PTEN mutation	0.4948	t-test	mean wildtype: 10.35; mean mutant: 12.37		PTEN mutation	0.6039	t-test	mean wildtype: 21.42; mean mutant: 24.31		PTEN mutation	0.8343	t-test	mean wildtype: 7.664; mean mutant: 7.400		PTEN mutation	0.7207	t-test	mean wildtype: 2.851; mean mutant: 2.723
SETD2 mutation	0.6262	t-test	mean wildtype: 28.96; mean mutant: 30.70		SETD2 mutation	0.8284	t-test	mean wildtype: 10.50; mean mutant: 10.11		SETD2 mutation	0.8059	t-test	mean wildtype: 21.67; mean mutant: 20.85		SETD2 mutation	0.0006	t-test	mean wildtype: 7.296; mean mutant: 9.854		SETD2 mutation	0.0193	t-test	mean wildtype: 2.776; mean mutant: 3.276
TP53 mutation	0.7475	t-test	mean wildtype: 29.14; mean mutant: 31.58		TP53 mutation	0.9653	t-test	mean wildtype: 10.44; mean mutant: 10.61		TP53 mutation	0.835	t-test	mean wildtype: 21.51; mean mutant: 22.98		TP53 mutation	0.5419	t-test	mean wildtype: 7.626; mean mutant: 8.601		TP53 mutation	0.8593	t-test	mean wildtype: 2.848; mean mutant: 2.767
VHL mutation	0.8617	t-test	mean wildtype: 29.44; mean mutant: 29.01		VHL mutation	0.8921	t-test	mean wildtype: 10.35; mean mutant: 10.52		VHL mutation	0.9427	t-test	mean wildtype: 21.46; mean mutant: 21.63		VHL mutation	0.2524	t-test	mean wildtype: 7.985; mean mutant: 7.385		VHL mutation	0.9381	t-test	mean wildtype: 2.852; mean mutant: 2.840
number of total mutations	0.3431	Spearman	Spearman r: -0.04741, CI: (-0.1474, 0.05353)		number of total mutations	0.3668	Spearman	Spearman r: -0.04513, CI: (-0.1451, 0.055841)		number of total mutations	0.3389	Spearman	Spearman r: -0.04782, CI: (-0.1478, 0.05312)		number of total mutations	0.8096	Spearman	Spearman r: -0.01206, CI: (-0.1126, 0.08873)		number of total mutations	0.4879	Spearman	Spearman r: 0.03469, CI: (-0.06622, 0.1349)
number of shortlist mutations	0.325	ANOVA			number of shortlist mutations	0.1668	ANOVA			number of shortlist mutations	0.1882	ANOVA			number of shortlist mutations	0.8821	ANOVA			number of shortlist mutations	0.0423	ANOVA
	0.4867	Spearman	Spearman r: -0.03479, CI: (-0.1350, 0.06612)			0.2898	Spearman	Spearman r: -0.05292, CI: (-0.1528, 0.04801)			0.1714	Spearman	Spearman r: -0.06835, CI: (-0.1679, 0.03255)			0.1424	Spearman	Spearman r: 0.07329, CI: (-0.02759, 0.1727)			0.0213	Spearman	Spearman r: 0.1148, CI: (0.01428, 0.2130)

## Sheet: TRA+TRB
low q diversity					inflection point slope diversity					ΔD diversity					high q diversity					inflection point q
Clinical Variable	p-value	test	result		Clinical Variable	p-value	test	result		Clinical Variable	p-value	test	result		Clinical Variable	p-value	test	result		Clinical Variable	p-value	test	result
score split by median	< 0.0001	t-test	mean below: 24.36; mean above: 84.65		score split by median	< 0.0001	t-test	mean below: 6.924; mean above: 36.53		score split by median	< 0.0001	t-test	mean below: 14.96; mean above: 70.38		score split by median	< 0.0001	t-test	mean below: 6.206; mean above: 17.45		score split by median	< 0.0001	t-test	mean below: 1.668; mean above: 4.144
overall survival (OS)	0.564	log-rank test	median survival below: 2564 days; above: 3615 days		overall survival (OS)	0.3102	log-rank test	median survival below: 2564 days; above: 3615 days		overall survival (OS)	0.2137	log-rank test	median survival below: 2564 days; above: 3615 days		overall survival (OS)	0.6561	log-rank test	median survival below: 2601 days; above: undef days		overall survival (OS)	0.3107	log-rank test	median survival below: 3554 days; above: 2564 days
gender (male vs female)	0.3654	t-test	mean male: 56.01; mean female: 51.87		gender (male vs female)	0.4698	t-test	mean male: 22.35; mean female: 20.65		gender (male vs female)	0.558	t-test	mean male: 43.61; mean female: 41.07		gender (male vs female)	0.0426	t-test	mean male: 12.40; mean female: 10.79		gender (male vs female)	0.055	t-test	mean male: 3.010; mean female: 2.719
race (white vs non-white)	0.051	t-test	mean white: 55.96; mean non-white: 40.58		race (white vs non-white)	0.1266	t-test	mean white: 22.28; mean non-white: 16.08		race (white vs non-white)	0.0784	t-test	mean white: 43.87; mean non-white: 30.74		race (white vs non-white)	0.0991	t-test	mean white: 12.09; mean non-white: 9.837		race (white vs non-white)	0.4754	t-test	mean white: 2.905; mean non-white: 3.092
grade	< 0.0001	ANOVA			grade	< 0.0001	ANOVA			grade	< 0.0001	ANOVA			grade	0.0817	ANOVA			grade	0.1161	ANOVA
pT	0.0011	ANOVA			pT	0.0059	ANOVA			pT	0.0034	ANOVA			pT	0.0993	ANOVA			pT	0.9531	ANOVA
pN	0.039	ANOVA			pN	0.1417	ANOVA			pN	0.0556	ANOVA			pN	0.1926	ANOVA			pN	0.7271	ANOVA
pM	0.0002	ANOVA			pM	0.0002	ANOVA			pM	0.0005	ANOVA			pM	0.0286	ANOVA			pM	0.592	ANOVA
BAP1 mutation	0.0112	t-test	mean wildtype: 53.15; mean mutant: 71.38		BAP1 mutation	0.0042	t-test	mean wildtype: 20.93; mean mutant: 31.56		BAP1 mutation	0.0075	t-test	mean wildtype: 41.36; mean mutant: 59.52		BAP1 mutation	0.9587	t-test	mean wildtype: 11.80; mean mutant: 11.86		BAP1 mutation	0.0568	t-test	mean wildtype: 2.936; mean mutant: 2.494
KDM5C mutation	0.0688	t-test	mean wildtype: 56.35; mean mutant: 40.31		KDM5C mutation	0.0627	t-test	mean wildtype: 22.72; mean mutant: 14.27		KDM5C mutation	0.0497	t-test	mean wildtype: 44.56; mean mutant: 28.21		KDM5C mutation	0.8347	t-test	mean wildtype: 11.78; mean mutant: 12.10		KDM5C mutation	0.1199	t-test	mean wildtype: 2.854; mean mutant: 3.296
MTOR mutation	0.622	t-test	mean wildtype: 55.49; mean mutant: 50.92		MTOR mutation	0.7485	t-test	mean wildtype: 22.22; mean mutant: 20.69		MTOR mutation	0.6557	t-test	mean wildtype: 43.65; mean mutant: 39.73		MTOR mutation	0.6758	t-test	mean wildtype: 11.85; mean mutant: 11.19		MTOR mutation	0.8436	t-test	mean wildtype: 2.890; mean mutant: 2.831
PBRM1 mutation	0.0082	t-test	mean wildtype: 59.94; mean mutant: 47.61		PBRM1 mutation	0.0008	t-test	mean wildtype: 25.19; mean mutant: 17.19		PBRM1 mutation	0.001	t-test	mean wildtype: 48.95; mean mutant: 34.48		PBRM1 mutation	0.007	t-test	mean wildtype: 10.98; mean mutant: 13.13		PBRM1 mutation	< 0.0001	t-test	mean wildtype: 2.645; mean mutant: 3.272
PTEN mutation	0.8602	t-test	mean wildtype: 55.11; mean mutant: 56.99		PTEN mutation	0.682	t-test	mean wildtype: 22.01; mean mutant: 24.27		PTEN mutation	0.8059	t-test	mean wildtype: 43.27; mean mutant: 45.76		PTEN mutation	0.7417	t-test	mean wildtype: 11.83; mean mutant: 11.23		PTEN mutation	0.4752	t-test	mean wildtype: 2.874; mean mutant: 3.120
SETD2 mutation	0.6433	t-test	mean wildtype: 54.77; mean mutant: 57.80		SETD2 mutation	0.9458	t-test	mean wildtype: 22.09; mean mutant: 22.32		SETD2 mutation	0.8687	t-test	mean wildtype: 43.54; mean mutant: 42.51		SETD2 mutation	0.0003	t-test	mean wildtype: 11.24; mean mutant: 15.29		SETD2 mutation	0.0139	t-test	mean wildtype: 2.813; mean mutant: 3.330
TP53 mutation	0.8933	t-test	mean wildtype: 55.15; mean mutant: 57.06		TP53 mutation	0.9505	t-test	mean wildtype: 22.11; mean mutant: 22.56		TP53 mutation	0.8786	t-test	mean wildtype: 43.34; mean mutant: 45.40		TP53 mutation	0.9517	t-test	mean wildtype: 11.81; mean mutant: 11.66		TP53 mutation	0.6021	t-test	mean wildtype: 2.892; mean mutant: 2.653
VHL mutation	0.7294	t-test	mean wildtype: 56.08; mean mutant: 54.50		VHL mutation	0.7858	t-test	mean wildtype: 22.48; mean mutant: 21.83		VHL mutation	0.8749	t-test	mean wildtype: 43.77; mean mutant: 43.09		VHL mutation	0.2475	t-test	mean wildtype: 12.31; mean mutant: 11.41		VHL mutation	0.7012	t-test	mean wildtype: 2.917; mean mutant: 2.861
number of total mutations	0.2637	Spearman	Spearman r: -0.05472, CI: (-0.1525, 0.04413)		number of total mutations	0.1601	Spearman	Spearman r: -0.06874, CI: (-0.1662, 0.03007)		number of total mutations	0.1812	Spearman	Spearman r: -0.06545, CI: -0.1630, 0.03338)		number of total mutations	0.6323	Spearman	Spearman r: 0.02344, CI: (-0.07535, 0.1218)		number of total mutations	0.3522	Spearman	Spearman r: 0.04557, CI: (-0.05329, 0.1435)
number of shortlist mutations	0.6066	ANOVA			number of shortlist mutations	0.3488	ANOVA			number of shortlist mutations	0.3905	ANOVA			number of shortlist mutations	0.4426	ANOVA			number of shortlist mutations	0.0459	ANOVA
	0.3956	Spearman	Spearman r: -0.04160, CI: (-0.1396, 0.05724)			0.1657	Spearman	Spearman r: -0.06785, CI: (-01654, 0.03097)			0.1332	Spearman	Spearman r: -0.07348, CI: (-0.1719 0.02532)			0.0932	Spearman	Spearman r: 0.8211, CI: (-0.01664, 0.1793)			0.0076	Spearman	Spearman r: 0.1302, CI: (0.03203, 0.2259)
